# Supplementary material for: Stabilisation of a nucleic acid three-way junction by an oligonucleotide containing a single 2′-C to 3′-O-phosphate butylene linkage prepared by a tandem RCM-hydrogenation method
Source: Royal Society of Chemistry journal article supplement (doi:10.1039/b502720a), 2005-01-01

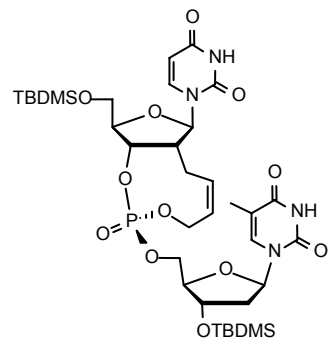

**6S**

(inkl. ~ 5% **6R**)

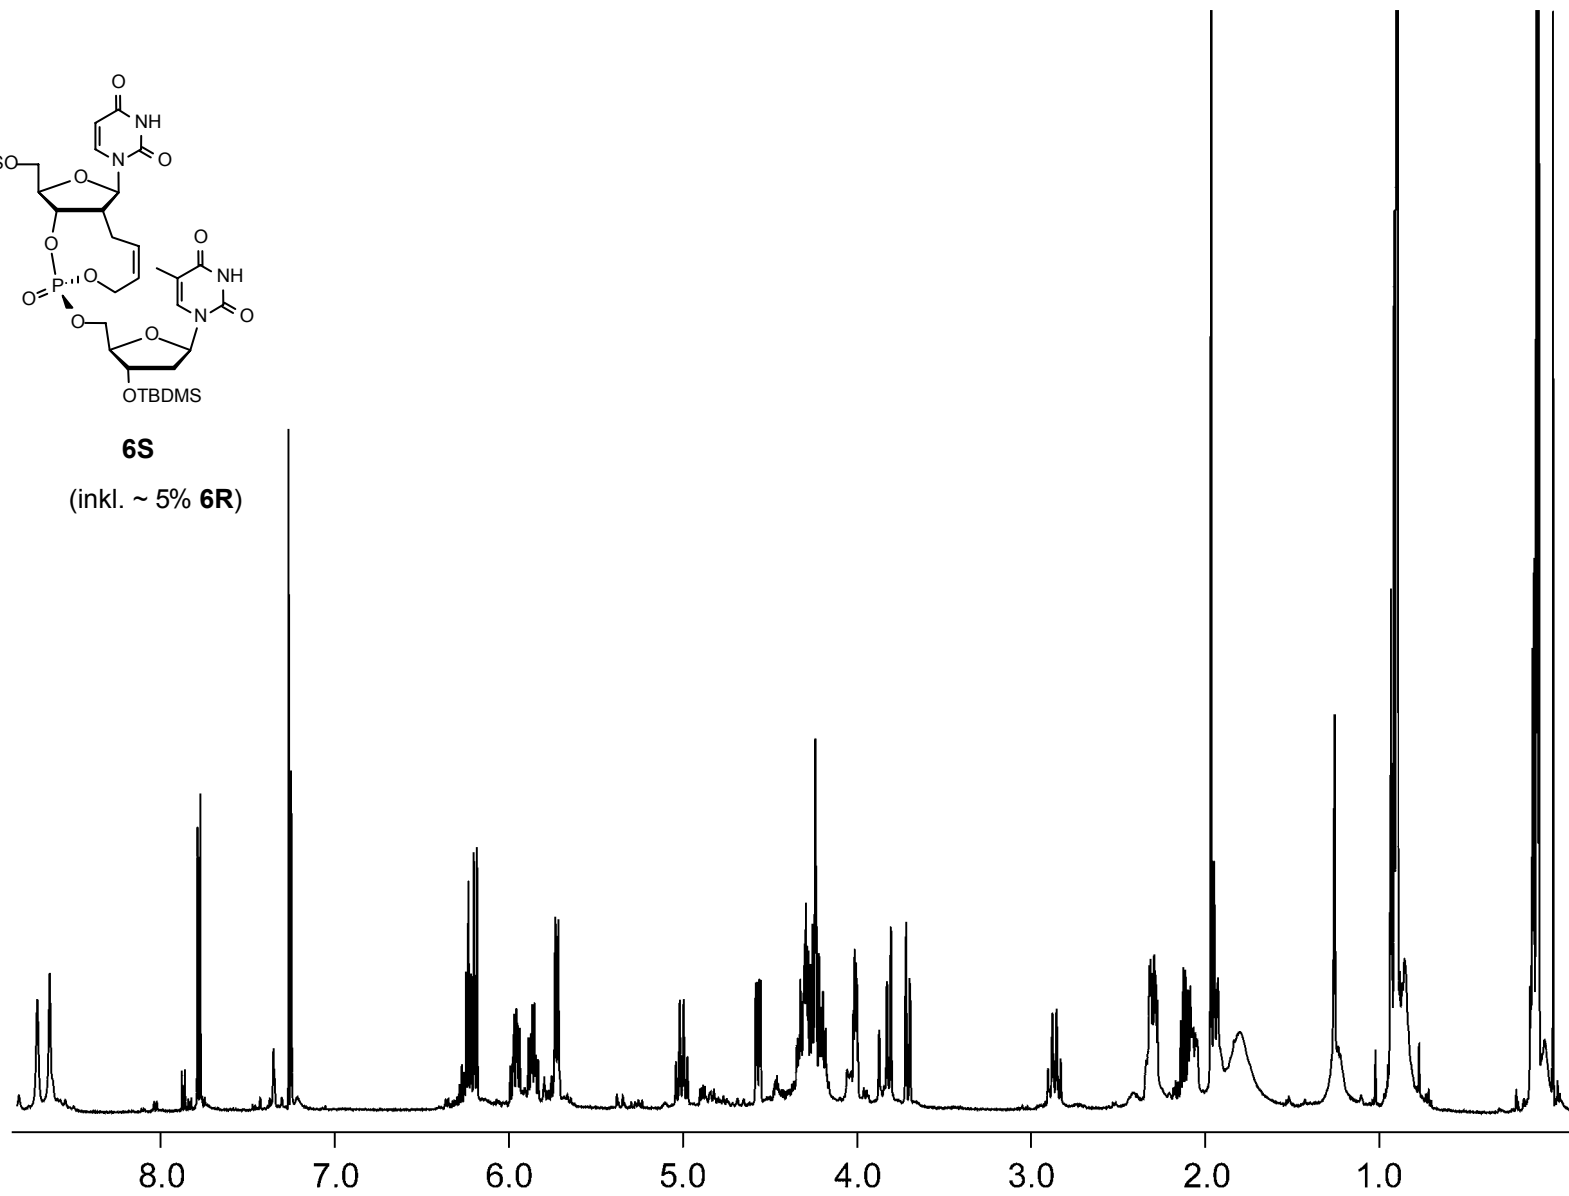

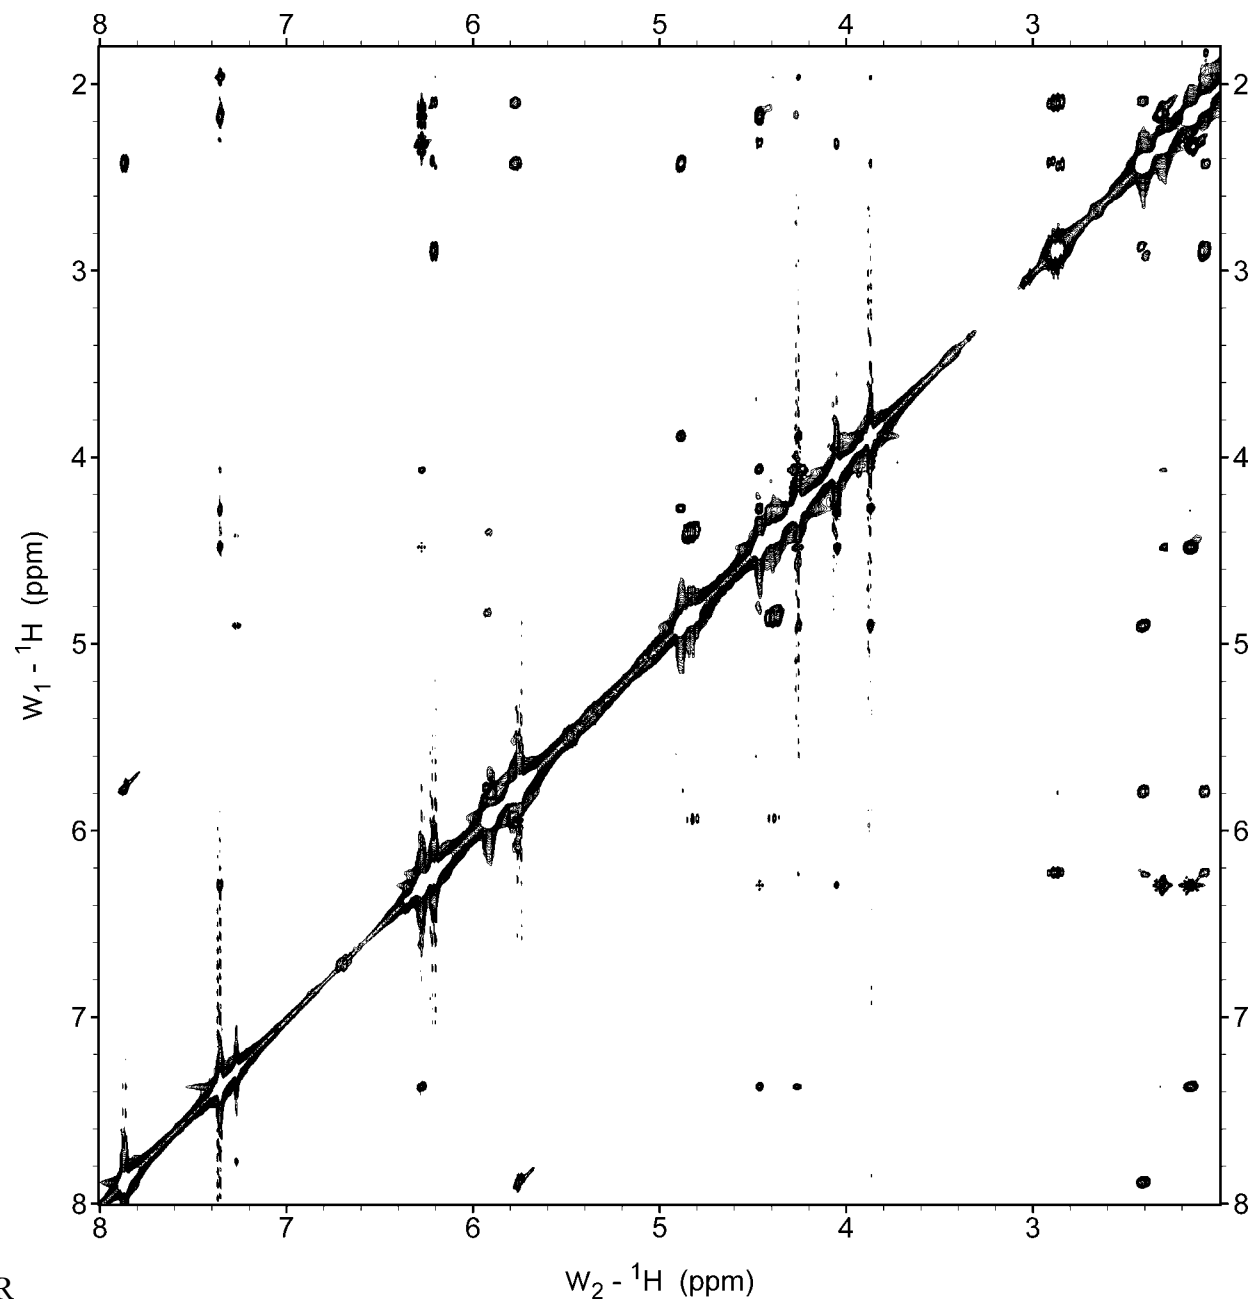

700 ms NOESY of 6R

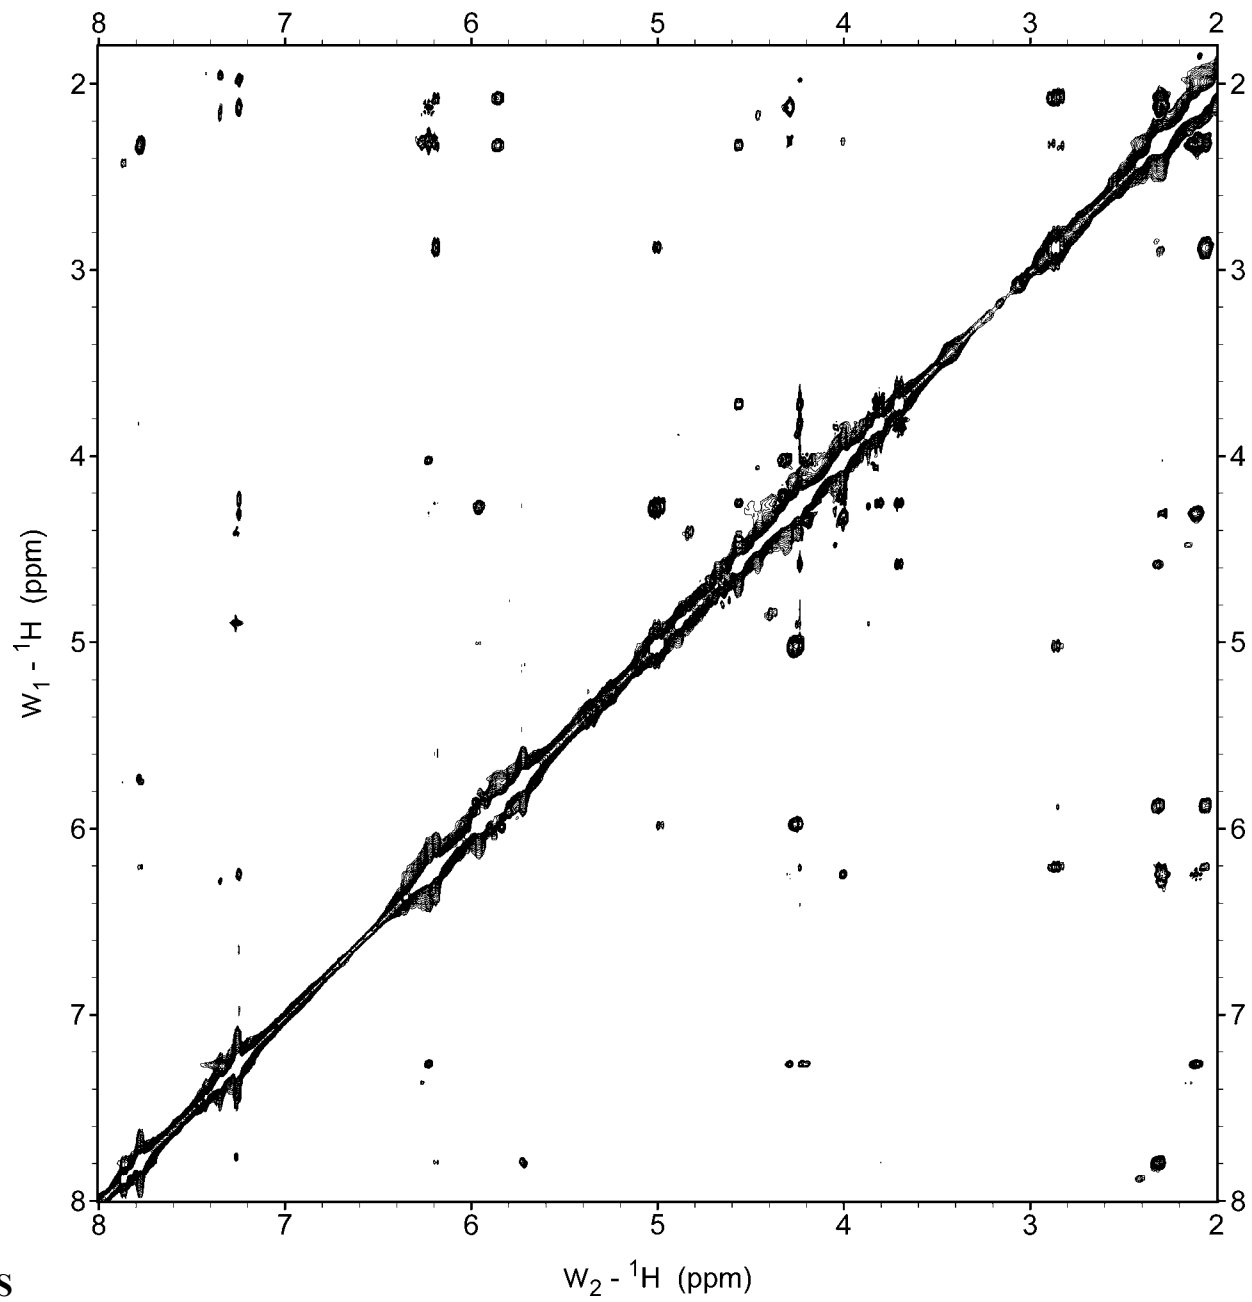

700 ms NOESY of **6S**

Energy minimised structures of the two epimers **6R** and **6S**, respectively.

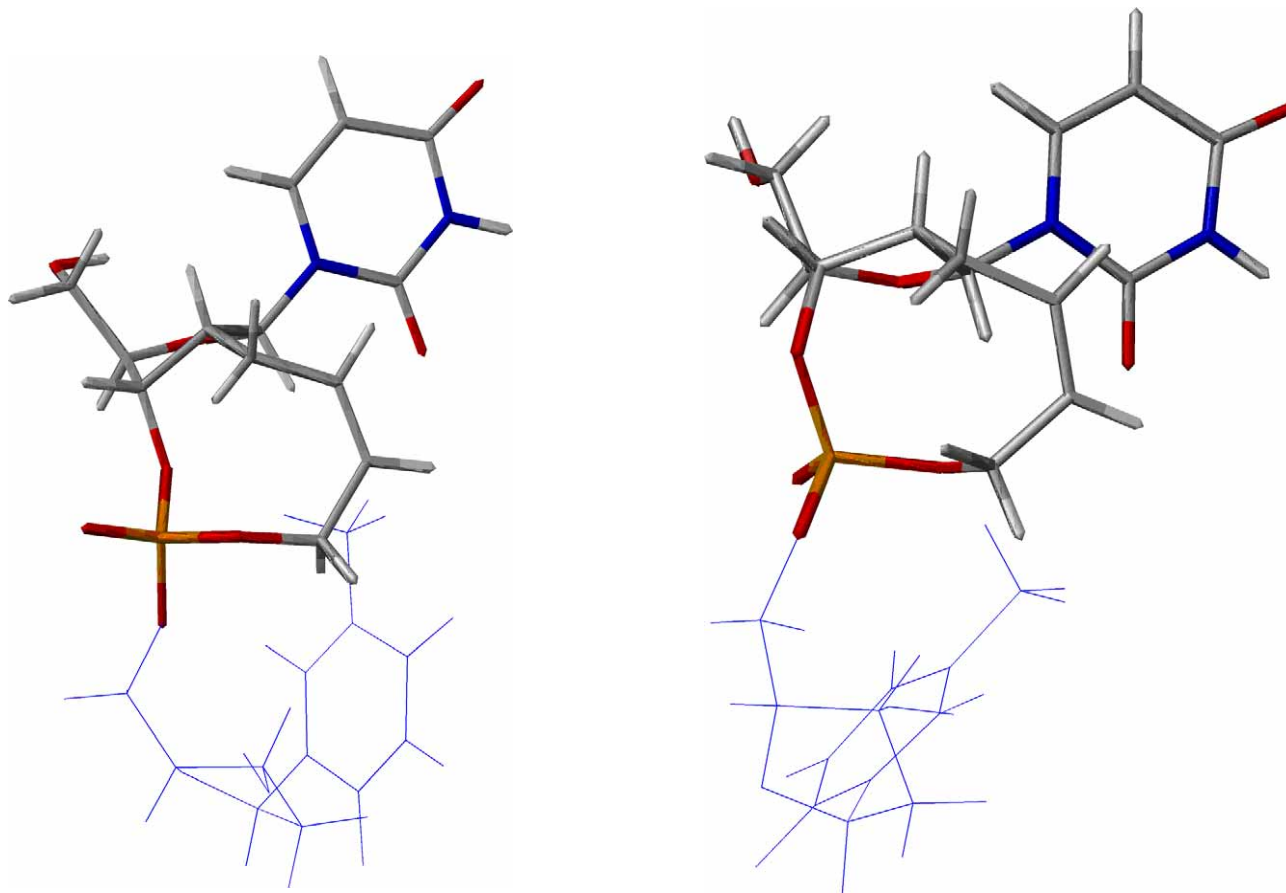

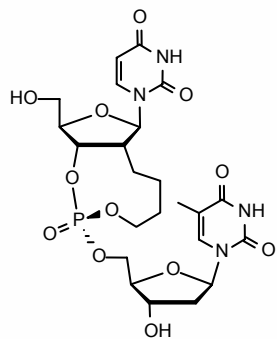

8R

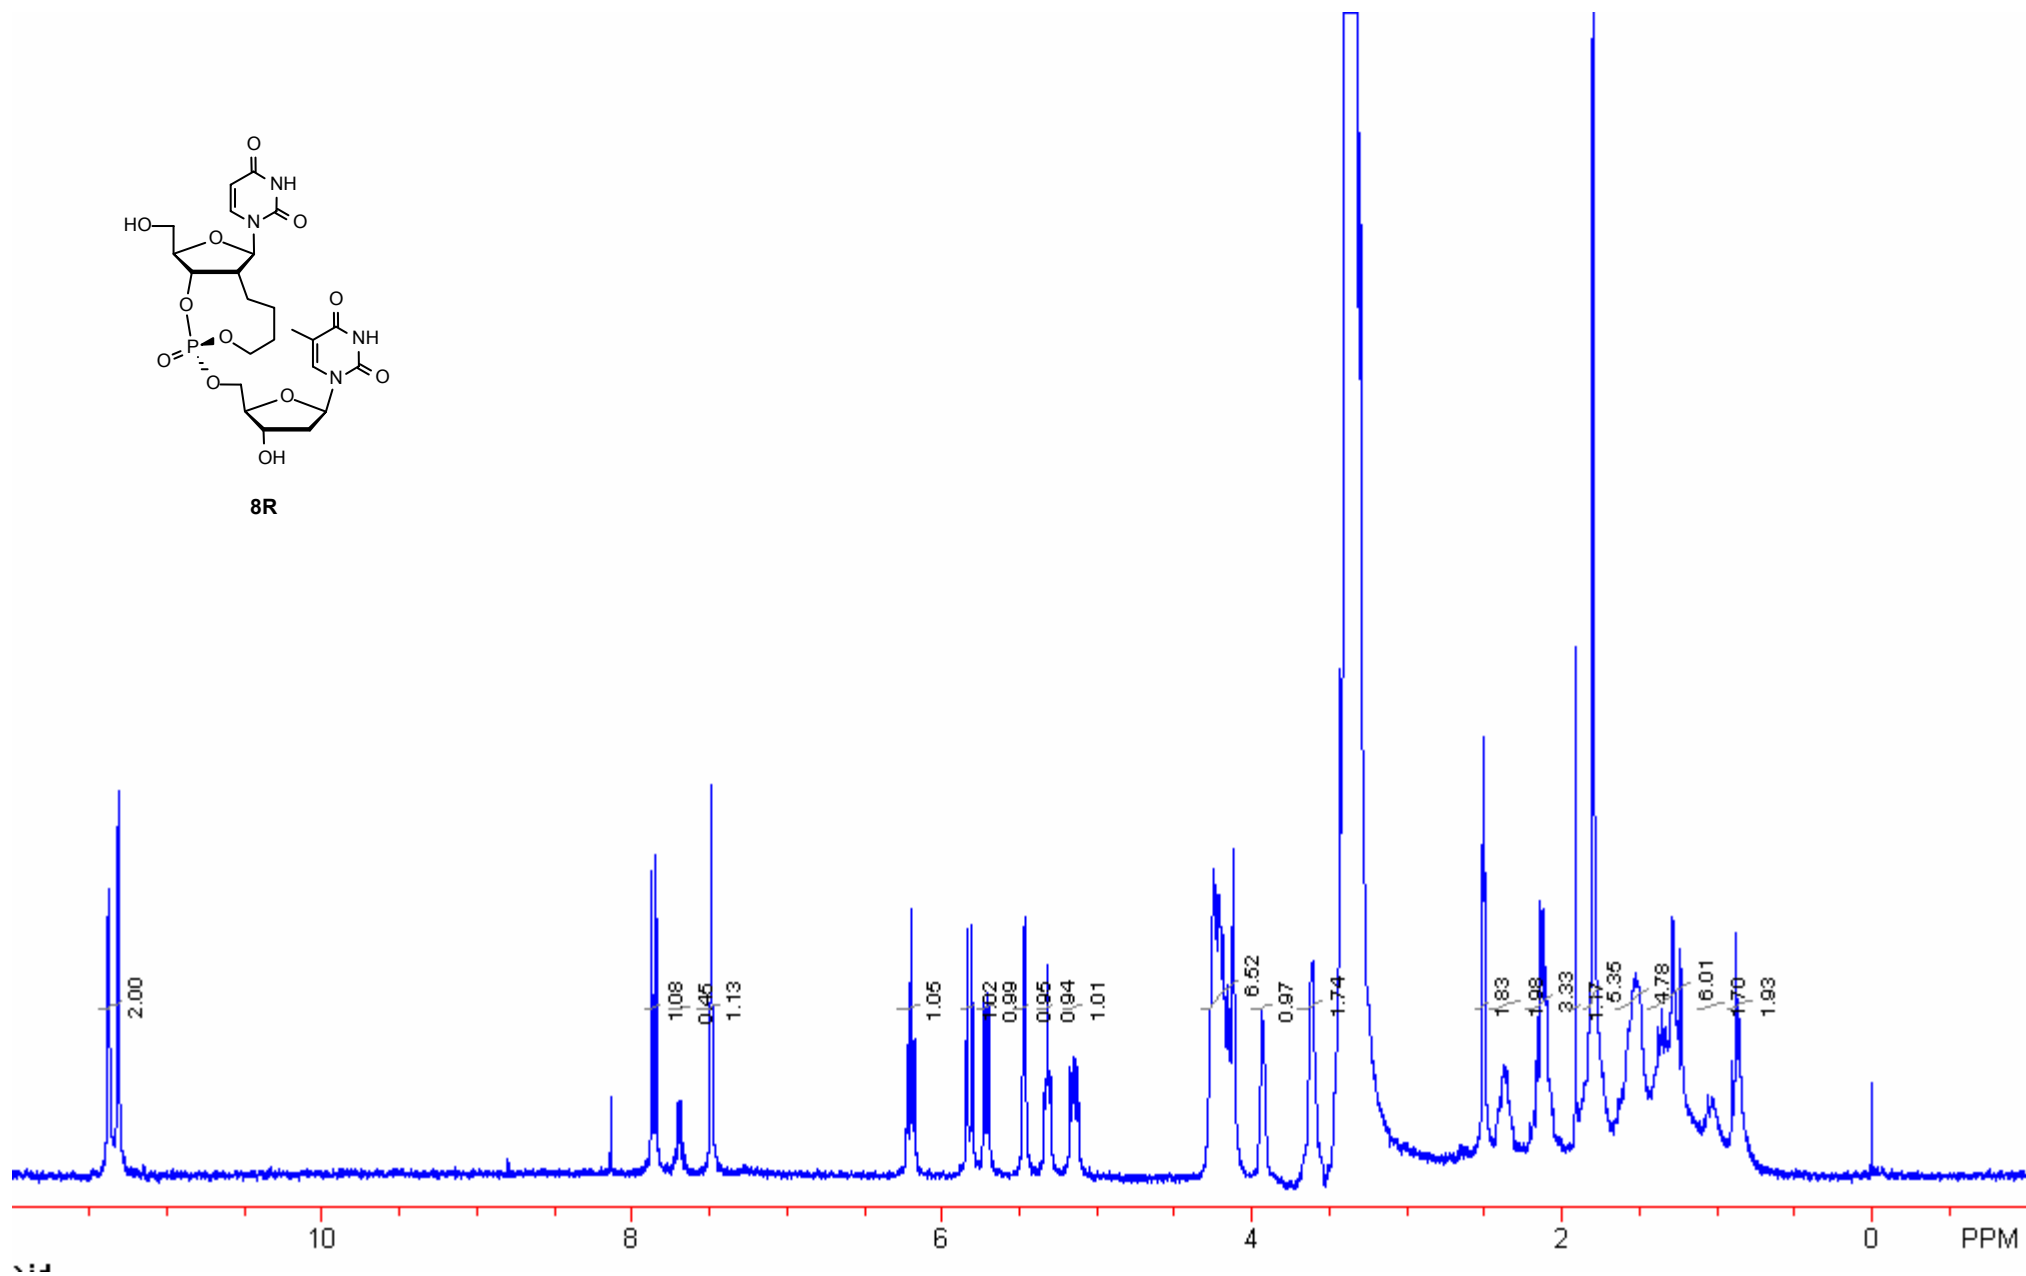

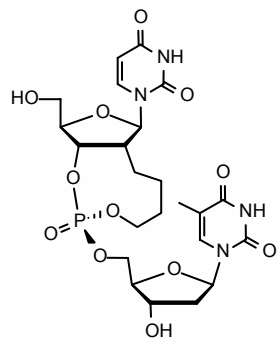

8S

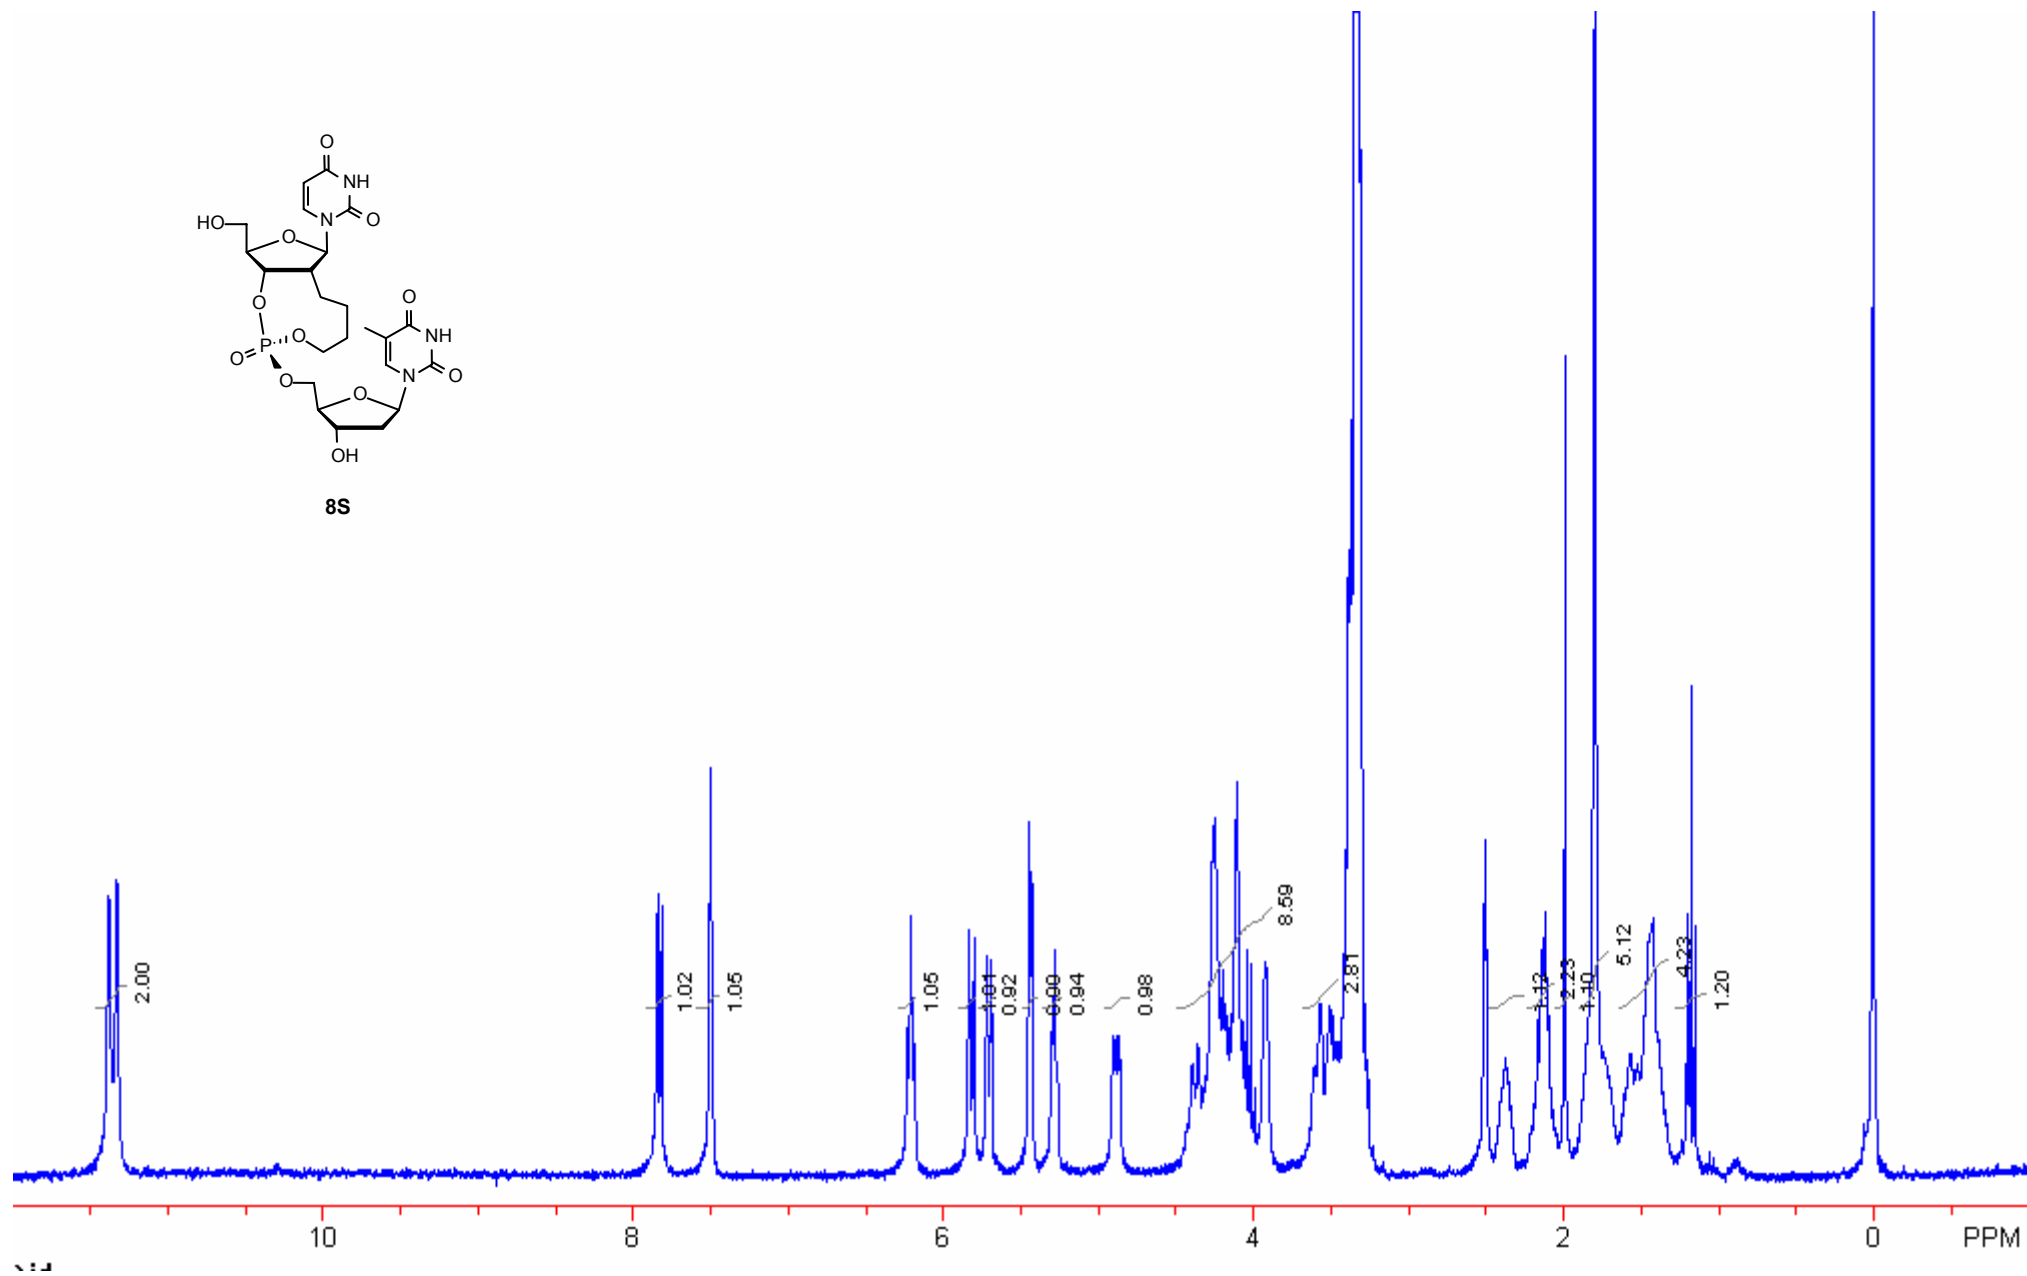

Supplement: b502720a.pdf [file b502720a.pdf]
